# Supplementary material for: Genome-wide transcript and protein analysis highlights the role of protein homeostasis in the aging mouse heart
Source: Genome Res. 2022 May;32(5):838–52. doi: 10.1101/gr.275672.121 (PMC9104701; doi:10.1101/gr.275672.121)
Supplement: Supplemental Material [file supp_gr.275672.121_Supplemental_Data_S10.xlsx]

## Sheet: README
Overall age effects on protein complex correlation
The overall age effect on the correlation between gene pairs, based on transcripts and proteins, for 123
protein complexes in the heart and 188 in the kidney. Age effects, standard errors, p-values, and
adjusted p-values (Benjaminin-Hochberg false discovery rate) for both transcripts and proteins were
computed using the lme4 software package (see Methods).
Columns dictionary:
Complex_name: name of the protein complex
Size: size of the protein complex in number of total subunits
Age_effect_Transcript: estimated age effect for transcript (log2 fold change per year)
Age_effect_SE_Transcript: standard error of the age effect for transcript
p_Transcript: test p-value for transcript
adjusted_p_Transcript: test adjusted p-value for transcript
Age_effect_Protein: estimated age effect for protein (log2 fold change per year)
Age_effect_SE_Protein: standard error of the age effect for protein
p_Protein: test p-value for protein
adjusted_p_Protein: test adjusted p-value for protein

## Sheet: Heart
Complex_name	Size	Age_effect_Transcript	Age_effect_SE_Transcript	p_Transcript	adjusted_p_Transcript	Age_effect_Protein	Age_effect_SE_Protein	p_Protein	adjusted_p_Protein
26S_Proteasome	43	0.0994791	0.00711377	0.443	0.813269	-0.204397	0.00611877	0.001	0.00878571
AP-1_adaptor_complex	5	-0.0500321	0.0688811	0.422	0.808015	-0.219016	0.0485565	0.032	0.0984
AP-3_adaptor_complex	6	-0.00361883	0.0616524	0.935	0.968496	-0.0215325	0.0409355	0.813	0.848492
Arp2/3_protein_complex	11	0.125213	0.0372814	0.023	0.39975	-0.102842	0.0218251	0.137	0.276246
B-WICH	6	0.0192926	0.0823885	0.797	0.937036	-0.0540721	0.0540002	0.64	0.718991
BAHD1	4	0.0418232	0.0988416	0.719	0.925063	-0.275428	0.0726267	0.007	0.03444
calcineurin_complex	4	-0.0816492	0.0925037	0.564	0.835841	-0.142544	0.0762694	0.18	0.318043
cAMP-dependent_protein_kinase	5	-0.118697	0.0847884	0.113	0.650875	0.0534092	0.0656387	0.522	0.66097
CF_IIAm_complex_(Cleavage_factor_IIAm_complex)	9	-0.00142588	0.0239227	0.975	0.991116	-0.0862407	0.0520089	0.153	0.294047
chaperonin-containing_T-complex	9	0.102142	0.0220754	0.315	0.722056	-0.279061	0.0265781	0.001	0.00878571
Chs5p/Arf-1binding_proteins_(ChAPs)	4	0.11892	0.0799423	0.244	0.661125	-0.107791	0.0360023	0.346	0.4879
Cohesin_complex	5	0.131799	0.0397685	0.379	0.782361	-0.0912378	0.0764138	0.353	0.4879
Conserved_oligomeric_Golgi_(COG)_complex	4	0.0908902	0.0531225	0.207	0.661125	0.0829286	0.114709	0.625	0.711806
COP9_signalosome	8	0.286987	0.0374406	0.004	0.164	-0.206697	0.0369021	0.011	0.0501111
COPI	9	0.0456737	0.0410222	0.306	0.722056	-0.0426604	0.0366886	0.532	0.66097
COPII	17	-0.0197609	0.0199429	0.515	0.835841	-0.108446	0.0235042	0.028	0.0906316
cytoplasmic_ribosomal_large_subunit	25	0.122467	0.00954934	0.376	0.782361	-0.13546	0.0120427	0.017	0.0633636
cytoplasmic_ribosomal_small_subunit	18	0.0773522	0.00893607	0.576	0.835841	-0.069493	0.0152472	0.161	0.304662
DNA-PK-Ku-eIF2-NF90-NF45_complex	5	-0.0182444	0.0586418	0.832	0.937036	-0.254806	0.0721911	0.006	0.032087
dynactin_complex	5	0.0473517	0.0991189	0.349	0.766554	-0.225158	0.0977696	0.001	0.00878571
Ecsit_complex_(ECSIT,_MT-CO2,_NDUFA1,_MT-ND1,_TRAF6,_NDUFAF1)	5	0.174201	0.0351976	0.238	0.661125	-0.0371627	0.101573	0.529	0.66097
eEF1	4	0.274349	0.0685989	0.112	0.650875	-0.0699477	0.0942897	0.544	0.66912
eIF2B	5	0.214935	0.0446133	0.427	0.808015	-0.00757569	0.0559324	0.947	0.947
eIF3	9	-0.0274465	0.059189	0.749	0.925545	-0.223788	0.0273855	0.001	0.00878571
eIF4F	7	-0.0113169	0.0560702	0.814	0.937036	-0.233173	0.0520672	0.001	0.00878571
ELL.com	5	-0.0908118	0.0687065	0.217	0.661125	-0.148649	0.0841881	0.144	0.285677
emerin	8	-0.0116828	0.0601922	0.888	0.966584	0.0502004	0.0470094	0.4	0.540659
emerin_C25	10	0.0256977	0.0338675	0.585	0.835841	-0.130687	0.0294763	0.069	0.176813
emerin_C32	7	-0.063731	0.0559189	0.258	0.661125	-0.314691	0.0511691	0.001	0.00878571
emerin_C52	14	-0.00287114	0.0294521	0.908	0.968496	-0.140011	0.0266081	0.012	0.0527143
Emerin_regulatory_complex	5	-0.0579031	0.126783	0.593	0.835841	0.119493	0.0829193	0.214	0.365583
ESCRT_III_complex	4	0.0944144	0.0723593	0.572	0.835841	-0.0465431	0.0593271	0.613	0.706963
Exocyst_complex	6	-0.0895474	0.0594999	0.082	0.593294	-0.16447	0.06539	0.084	0.20664
Exon_Junction_Complex_(EJC)	8	-0.0409447	0.0652921	0.439	0.813269	-0.202489	0.040289	0.002	0.0144706
FIB-associated_protein_complex	4	-0.0267576	0.034021	0.76	0.925545	0.0882548	0.0980638	0.357	0.4879
Flag-FCP1	5	-0.0179208	0.0716344	0.756	0.925545	-0.0954618	0.0529338	0.279	0.439063
Gac1p/Glc7p_complex	5	0.0197464	0.0696847	0.785	0.937036	-0.123762	0.0533654	0.181	0.318043
H+-transporting_ATPase,_vacuolar	10	0.0722799	0.0367311	0.189	0.661125	-0.0844889	0.0394025	0.086	0.207412
H2AX_complex,_isolated_from_cells_without_IR_exposure	7	-0.0371417	0.0615429	0.583	0.835841	-0.192041	0.0547975	0.027	0.0906316
H3.3_com	5	-0.0337393	0.0494988	0.648	0.871696	-0.0877562	0.0884999	0.224	0.372324
HCF-1N	9	-0.0839698	0.0469248	0.045	0.50225	-0.269007	0.0391652	0.002	0.0144706
HDAC1-PP1	4	0.0966166	0.146206	0.388	0.782361	-0.126333	0.0957267	0.223	0.372324
heterotrimeric_G-protein_complex	6	-0.0260314	0.0502788	0.576	0.835841	-0.175927	0.10548	0.016	0.0615
HMC_Complex	7	-0.0275581	0.0443101	0.619	0.855472	-0.0544334	0.0416496	0.418	0.552839
HMGB1-HMGB2-HSC70-ERP60-GAPDH_complex	5	0.000179594	0.0504148	1	1	0.0144347	0.052	0.851	0.872275
HOPS_complex	4	-0.154298	0.102046	0.127	0.650875	0.0783726	0.0825605	0.582	0.697788
Hym1p/Kic1p/Sog2p_complex	4	-0.0581415	0.0940523	0.53	0.835841	-0.0616141	0.114903	0.46	0.589375
INO80.com	7	0.136104	0.0484967	0.248	0.661125	0.0526736	0.0644009	0.331	0.4879
ISW1b_complex	5	-0.051176	0.0396729	0.226	0.661125	-0.353163	0.083942	0.001	0.00878571
ITGA2b-ITGB3-CD9-GP1b-CD47_complex	6	0.119143	0.062339	0.527	0.835841	-0.0859318	0.0394394	0.357	0.4879
ITGA6-ITGB4-Laminin10/12_complex	4	-0.144376	0.0935264	0.145	0.661125	0.0233297	0.0761893	0.763	0.816078
Kinase_maturation_complex_1	10	-0.0642442	0.0400303	0.213	0.661125	-0.115652	0.0215978	0.045	0.135
Large_Drosha_complex	15	-0.0303368	0.0250133	0.512	0.835841	-0.289932	0.0228816	0.001	0.00878571
Mitochondrial_complex_I	7	0.196449	0.0236125	0.186	0.661125	0.069591	0.0661984	0.318	0.4785
Mitochondrial_complex_II	4	0.0567061	0.0799303	0.482	0.835841	0.0378808	0.0880446	0.676	0.735823
Mitochondrial_complex_III	9	0.297538	0.0272259	0.026	0.39975	-0.0461113	0.0404727	0.439	0.574436
Mitochondrial_complex_IV	9	0.227807	0.0263743	0.041	0.50225	-0.210905	0.040509	0.002	0.0144706
Mitochondrial_complex_V	13	0.273041	0.0158968	0.015	0.369	-0.0789913	0.0299609	0.228	0.37392
Mitochondrial_inner_membrane_translocase	5	0.232936	0.0363099	0.197	0.661125	0.0920544	0.0545384	0.171	0.309309
Mitochondrial_outer_membrane_translocase	5	0.205309	0.0690457	0.078	0.593294	-0.202829	0.0591921	0.005	0.0292857
mitochondrial_oxoglutarate_dehydrogenase_complex	4	-0.148742	0.0623381	0.148	0.661125	0.0138845	0.0736455	0.895	0.909793
mitochondrial_pyruvate_dehydrogenase_complex	8	0.00982212	0.0425086	0.856	0.940071	-0.0324209	0.037938	0.643	0.718991
mitochondrial_ribosomal_large_subunit	32	0.234	0.00737401	0.182	0.661125	-0.0879812	0.0102386	0.051	0.149357
mitochondrial_ribosomal_small_subunit	17	0.216115	0.0159057	0.206	0.661125	-0.0206785	0.0171996	0.657	0.728027
Mob1p/Dbf2p_complex	5	-0.0493371	0.0665323	0.245	0.661125	-0.0440379	0.0746247	0.59	0.697788
Mob2p/Cbk1p_complex	4	0.0381099	0.0996994	0.652	0.871696	0.178141	0.0889598	0.094	0.218151
mRNA_cleavage_factor_complex_(CFI)	11	-0.0579796	0.0302054	0.187	0.661125	-0.0305515	0.0375806	0.675	0.735823
multi-eIF_complex	8	0.200152	0.0552164	0.002	0.164	-0.273419	0.0509898	0.001	0.00878571
multi-tRNAsynthase_complex	10	0.0330805	0.0468277	0.628	0.858267	-0.198004	0.0353407	0.005	0.0292857
NatA_complex	4	-0.0409088	0.0727122	0.56	0.835841	-0.0107971	0.0882442	0.924	0.931574
Nuclear_cap_binding_complex_(NCBC)	5	-0.0331284	0.113322	0.598	0.835841	-0.1236	0.0894021	0.198	0.343014
Nuclear_pore_complex_(NPC)	12	0.0447852	0.0344209	0.133	0.65436	-0.250889	0.0246591	0.001	0.00878571
nuclear_ubiquitin_ligase_complex	6	-0.0305106	0.0674197	0.754	0.925545	-0.182996	0.0427991	0.059	0.157761
NuRD_complex	6	-0.0459412	0.0682835	0.333	0.744709	-0.0640722	0.0551063	0.455	0.589105
oligosaccharyl_transferase_complex	7	-0.0891684	0.0509348	0.317	0.722056	-0.22225	0.0543609	0.003	0.0205
P2X7_receptor_signalling_complex	5	-0.0852723	0.065297	0.235	0.661125	-0.125965	0.0578323	0.03	0.0946154
PAM_complex	5	0.138755	0.048346	0.049	0.50225	-0.0215422	0.0730413	0.814	0.848492
PFD-like	5	0.151105	0.0757477	0.246	0.661125	-0.0862732	0.056295	0.319	0.4785
Polycystin-1_multiprotein_complex_(ACTN1,_CDH1,_SRC,_JUP,_VCL,_CTNNB1,_PXN,_BCAR1,_PKD1,_PTK2,_TLN1)	7	0.177658	0.0465595	0.211	0.661125	-0.174853	0.042182	0.015	0.0595161
prefoldin_complex	4	0.26677	0.0758404	0.113	0.650875	-0.12039	0.0311671	0.133	0.27265
Profilin_1_complex	4	-0.0192559	0.124574	0.777	0.936971	0.0613516	0.0747527	0.589	0.697788
protein_phosphatase_type_2A_complex_(Rts1p)	7	-0.0403046	0.069709	0.52	0.835841	-0.139638	0.0477823	0.056	0.157761
RAF1-PPP2-PIN1_complex	5	0.0155634	0.113687	0.918	0.968496	-0.0963019	0.0675531	0.348	0.4879
RC_complex_during_S-phase_of_cell_cycle	4	0.0236678	0.102659	0.827	0.937036	-0.233397	0.0986325	0.027	0.0906316
retromer_complex	7	-0.0350358	0.0475127	0.597	0.835841	-0.149294	0.0484888	0.122	0.263263
RICH1/AMOT_polarity_complex,_Flag-Rich1_precipitated	7	-0.0113473	0.0370798	0.818	0.937036	-0.142792	0.0423058	0.058	0.157761
RNA_pol_II_containing_coactivator_complex_Tat-SF	4	-0.186697	0.0909247	0.022	0.39975	-0.191498	0.0950081	0.058	0.157761
RNA_polymerase_II_core_complex	4	-0.107495	0.159928	0.273	0.685286	-0.0774614	0.139239	0.615	0.706963
Rot2p/Gtb1p_complex	4	-0.0324933	0.0780249	0.722	0.925063	-0.105921	0.0740611	0.342	0.4879
RSC	8	-0.00628584	0.049765	0.838	0.937036	-0.164359	0.0300075	0.019	0.0687353
SCF-CDC4_complex	6	0.196751	0.071936	0.015	0.369	-0.0895211	0.0504445	0.282	0.439063
Septin_complex	5	0.155263	0.0499743	0.117	0.650875	-0.235509	0.0589739	0.007	0.03444
Signal_recognition_particle_(SRP)_complex	4	-0.104522	0.0729373	0.236	0.661125	-0.204897	0.104297	0.028	0.0906316
Sin3-CI	5	-0.0383986	0.09092	0.549	0.835841	-0.147043	0.0541927	0.131	0.27265
SMG-1-Upf1-eRF1-eRF3_complex_(SURF)	4	-0.00918873	0.172573	0.934	0.968496	-0.251679	0.0909664	0.004	0.0258947
SMN-PolII-RHA_complex	4	-0.0162794	0.15137	0.85	0.940071	-0.201278	0.107311	0.089	0.210519
SNARE_complex	4	0.0738374	0.0707101	0.279	0.68634	-0.0840765	0.0607275	0.345	0.4879
Snf1p/Snf4p/Sip2p_complex	6	-0.0245056	0.0618756	0.569	0.835841	-0.0157635	0.0514594	0.823	0.850664
Spliceosome-A	12	-0.00761811	0.0304718	0.921	0.968496	-0.20068	0.0318936	0.001	0.00878571
Spliceosome-B	5	0.0863228	0.0985898	0.08	0.593294	-0.138617	0.053286	0.121	0.263263
Spliceosome-LSm	4	0.205951	0.111226	0.089	0.608167	-0.149532	0.0732706	0.082	0.205837
Spliceosome-Sm	5	0.25092	0.048752	0.169	0.661125	-0.0209565	0.0725226	0.788	0.835552
Spliceosome-U2	9	0.0143463	0.0531939	0.753	0.925545	-0.250182	0.0327963	0.001	0.00878571
Spliceosome-U5	7	-0.0449196	0.0372872	0.502	0.835841	-0.140443	0.0435411	0.104	0.236889
SRm160/300_complex	5	-0.246353	0.0936768	0.037	0.50225	-0.175063	0.0490465	0.061	0.159638
Sro1p/Sec4p/Sec9p_complex	4	0.0195128	0.0615114	0.829	0.937036	-0.107784	0.0905511	0.303	0.465863
STE5-MAPK_complex	5	-0.0546867	0.0586586	0.366	0.782361	0.0329993	0.0706571	0.736	0.794105
Survival_of_motor_neuron_(SMN)_complex	6	0.283518	0.0360497	0.127	0.650875	-0.101542	0.064873	0.149	0.290905
Suv39h1	4	-0.099688	0.0705335	0.256	0.661125	-0.426493	0.107527	0.001	0.00878571
telomerase	6	0.022395	0.0675935	0.678	0.89671	-0.178311	0.0624441	0.013	0.0551379
TNF-alpha/NF-kappa_B_signaling_complex_(CHUK,_BTRC,_NFKB2,_PPP6C,_REL,_CUL1,_IKBKE,_SAPS2,_SAPS1,_ANKRD28,_RELA,_SKP1)	8	-0.0578646	0.0479498	0.082	0.593294	-0.218812	0.0417675	0.01	0.0473077
TNF-alpha/Nf-kappa_B_signaling_complex_(RPL6,_RPL30,_RPS13,_CHUK,_DDX3X,_NFKB2,_NFKBIB,_REL,_IKBKG,_NFKB1,_MAP3K8,_RELB,_GLG1,_NFKBIA,_RELA,_TNIP2,__GTF2I)	7	0.0467408	0.0487323	0.388	0.782361	-0.094253	0.0461745	0.277	0.439063
TNF-alpha/NF-kappa_B_signaling_complex_6	9	0.136776	0.0294426	0.401	0.795532	-0.0787204	0.0418473	0.128	0.271448
TNF-alpha/NF-kappa_B_signaling_complex_7	4	0.00204343	0.174599	0.974	0.991116	-0.28259	0.0843099	0.015	0.0595161
Toposome	5	-0.0326917	0.0880161	0.692	0.905489	-0.0661566	0.0631367	0.554	0.674673
Transcription-export_(TREX)_complex	4	0.226252	0.0667051	0.308	0.722056	-0.449629	0.0987901	0.001	0.00878571
TRAPP_complex	7	-0.0506699	0.0760309	0.45	0.813971	-0.298661	0.0632292	0.006	0.032087
Tubulins	10	-0.0386172	0.028561	0.51	0.835841	-0.0559603	0.0418003	0.41	0.548152
Ubiquilin-proteasome_complex	6	0.22106	0.130141	0.003	0.164	-0.116677	0.0401668	0.168	0.309309
Ubiquitin_E3_ligase_(ASB2,_TCEB1,_TCEB2,_CUL5,_RNF7)	4	-0.0806293	0.0785364	0.421	0.808015	-0.124661	0.0690221	0.17	0.309309
UTM-SGCE-DAG1-CAV1-NOS3_complex	5	0.00051851	0.0847801	0.988	0.996098	-0.178206	0.0741495	0.115	0.257182
Wave-2_complex	4	0.00837519	0.111792	0.937	0.968496	-0.0547081	0.113528	0.612	0.706963
Yph1-L	10	0.193295	0.0261571	0.066	0.593294	-0.0720157	0.0376423	0.252	0.407842

## Sheet: Kidney
Complex_name	Size	Age_effect_Transcript	Age_effect_SE_Transcript	p_Transcript	adjusted_p_Transcript	Age_effect_Protein	Age_effect_SE_Protein	p_Protein	adjusted_p_Protein
26S_Proteasome	34	-0.0418539	0.00762262	0.493	0.832155	0.109082	0.015109	0.358	0.734189
53BP1-containing_complex	5	0.052577	0.0654488	0.584	0.835556	-0.199873	0.0694451	0.039	0.166636
actin_cytoskeleton-regulatory_complex,_Pan1p/Sla1p/End3p_complex	4	0.116065	0.120534	0.031	0.4136	0.0210869	0.125801	0.867	0.952603
AF4.com	9	0.00909126	0.0383424	0.721	0.881403	0.0443011	0.0519032	0.376	0.736333
Anaphase_promoting_complex_(APC)	8	-0.0860871	0.0406985	0.105	0.715613	0.189876	0.061509	0.443	0.793607
AP-1_adaptor_complex	10	-0.0115676	0.0326918	0.563	0.832155	-0.113467	0.0485054	0.618	0.869851
AP-3_adaptor_complex	6	-0.0566035	0.0640578	0.135	0.746471	0.0196126	0.0518065	0.87	0.952603
Arp2/3_protein_complex	9	0.130346	0.0486349	0.099	0.715613	0.0436613	0.0399526	0.809	0.952603
B-WICH	7	0.113105	0.0309016	0.135	0.746471	0.115689	0.0527071	0.179	0.48771
BAF_complex	14	0.0355634	0.0280579	0.265	0.766242	0.109669	0.0284223	0.068	0.250667
BAHD1	4	0.0635736	0.103819	0.455	0.824308	0.297344	0.0983011	0.01	0.0569697
BCDIN3-TAP	4	-0.00949105	0.0755959	0.935	0.982011	0.446849	0.122598	0.001	0.00989474
BLOC1-BLOC2_complex	10	0.0147395	0.0347821	0.856	0.93022	-0.0344295	0.0396043	0.689	0.918667
calcineurin_complex	4	-0.00230435	0.06791	0.98	0.991273	0.16466	0.0670636	0.364	0.734189
cAMP-dependent_protein_kinase	6	-0.0181315	0.0560547	0.676	0.877766	-0.0115992	0.056381	0.875	0.952603
CCR4-NOT_complex	10	-0.0170149	0.0297244	0.571	0.832155	-0.0108927	0.0639417	0.96	0.979632
CD147-gamma-secretase_complex_(APH-1a,_PS-1,_PEN-2,_NCT_variant)	4	0.0976922	0.0546884	0.309	0.771674	-0.148801	0.0904848	0.111	0.336581
CF_IIAm_complex_(Cleavage_factor_IIAm_complex)	12	0.0160148	0.0244235	0.554	0.832155	0.317807	0.0346865	0.001	0.00989474
chaperonin-containing_T-complex	9	-0.00878485	0.0242477	0.889	0.949614	-0.021644	0.0175271	0.705	0.919255
Chs5p/Arf-1binding_proteins_(ChAPs)	4	0.0492978	0.0678019	0.6	0.835556	-0.17099	0.0640757	0.221	0.553973
Cohesin_complex	8	0.0779993	0.0301543	0.456	0.824308	-0.097306	0.0369896	0.469	0.793607
COMPASS_complex	6	-0.0388007	0.044957	0.495	0.832155	0.260709	0.0401963	0.001	0.00989474
Conserved_oligomeric_Golgi_(COG)_complex	8	0.0235127	0.0340342	0.713	0.881403	-0.020081	0.00690044	0.514	0.793607
COP9_signalosome	9	0.0272777	0.032495	0.805	0.916217	0.0259194	0.0436687	0.928	0.967006
COPI	10	-0.0492152	0.0302163	0.375	0.772215	-0.141868	0.0568154	0.561	0.823969
COPII	18	-0.100472	0.0200588	0.028	0.404923	-0.0766292	0.0268212	0.345	0.720667
COREST_complex	4	0.03733	0.118933	0.692	0.879027	0.230098	0.0836529	0.052	0.207583
CRM1-RAN-PHAX-CBC_complex_(cap_binding_complex)	4	-0.107268	0.0700737	0.222	0.752	0.535194	0.19067	0.007	0.0438667
CtBP	7	-0.0419943	0.0422696	0.193	0.752	0.195679	0.0461988	0.009	0.052875
Cul3p-RING_ubiquitin_ligase_complex	5	-0.172602	0.0609572	0.057	0.593684	-0.0149461	0.130132	0.851	0.952603
CUL4/DDB1	4	-0.048094	0.0741716	0.55	0.832155	-0.0321074	0.116632	0.774	0.938787
cytoplasmic_dynein_complex	4	-0.0990066	0.153883	0.079	0.670261	-0.140309	0.0512032	0.075	0.2632
cytoplasmic_ribosomal_large_subunit	24	0.0603606	0.0096144	0.6	0.835556	0.0422161	0.0112769	0.444	0.793607
cytoplasmic_ribosomal_small_subunit	18	0.169952	0.0137231	0.362	0.772215	0.184746	0.0126256	0.102	0.325867
DNA_repair_complex_NEIL2-PNK-Pol(beta)-LigIII(alpha)-XRCC1	4	0.0567329	0.0904116	0.353	0.771674	-0.0310607	0.0916319	0.709	0.919255
DNA-PK-Ku-eIF2-NF90-NF45_complex	9	0.0406367	0.0347134	0.392	0.784	0.0137053	0.0459843	0.904	0.952603
Dsl1p_complex	5	0.107235	0.0734728	0.288	0.771674	-0.303972	0.0867971	0.018	0.0890526
dynactin_complex	4	-9.83079e-05	0.0521671	0.999	0.999	0.189172	0.108957	0.672	0.911597
Ecsit_complex_(ECSIT,_MT-CO2,_NDUFA1,_MT-ND1,_TRAF6,_NDUFAF1)	5	0.0143287	0.0896697	0.887	0.949614	-0.131148	0.082307	0.489	0.793607
eEF1	4	0.160171	0.0795086	0.269	0.766242	0.0520679	0.176909	0.72	0.920816
eIF2B	5	0.123823	0.0434776	0.343	0.771674	0.0116604	0.0817724	0.977	0.987505
eIF3	10	0.0204863	0.0265122	0.629	0.860563	0.0195006	0.0286824	0.874	0.952603
eIF4F	8	-0.0514615	0.0330698	0.365	0.772215	-0.0901808	0.0726073	0.417	0.78584
EKC/KEOPS_protein_complex	4	0.0809382	0.111886	0.478	0.832155	-0.11082	0.087289	0.17	0.477015
ELL.com	8	0.0257754	0.0357203	0.531	0.832155	0.279411	0.0530876	0.001	0.00989474
Elongator_complex	4	-0.0887732	0.0849902	0.424	0.79295	0.146739	0.12402	0.734	0.929906
emerin	12	-0.114807	0.0348751	0.017	0.404923	0.136922	0.0313487	0.022	0.096186
emerin_C24	6	0.0727469	0.0772671	0.218	0.752	0.0860053	0.0617159	0.491	0.793607
emerin_C25	11	0.037085	0.0292643	0.587	0.835556	-0.0803661	0.046071	0.2	0.524833
emerin_C32	14	-0.0169627	0.0317466	0.65	0.860563	0.189332	0.023511	0.001	0.00989474
emerin_C52	15	0.026523	0.0203996	0.342	0.771674	-0.00395891	0.0317819	0.953	0.979038
Emerin_regulatory_complex	8	-0.0510905	0.0612043	0.424	0.79295	0.00811925	0.0352031	0.896	0.952603
ESCRT_III_complex	5	-0.00314065	0.0771045	0.986	0.991273	0.00986968	0.10788	0.905	0.952603
ESR1-CDK7-CCNH-MNAT1-MTA1-HDAC2_complex	4	0.0180348	0.105479	0.845	0.927977	0.171751	0.106173	0.129	0.384952
Exocyst_complex	8	0.0157954	0.0257065	0.769	0.891854	-0.00935027	0.0140039	0.876	0.952603
Exon_Junction_Complex_(EJC)	10	-0.0338205	0.032539	0.426	0.79295	0.207791	0.0403942	0.001	0.00989474
Exosome	9	0.178507	0.0294507	0.134	0.746471	0.0419983	0.0377702	0.602	0.857394
Fatty_Acid_Import_Complex	5	0.026675	0.0563976	0.591	0.835556	-0.0255681	0.088431	0.903	0.952603
FIB-associated_protein_complex	4	-0.0300193	0.118271	0.754	0.891854	-0.0836344	0.126205	0.341	0.720315
Flag-FCP1	7	0.0239968	0.0554675	0.647	0.860563	0.28179	0.0957237	0.001	0.00989474
GPI-anchor_transamidase_complex	4	-0.0232354	0.083377	0.767	0.891854	0.109429	0.139265	0.371	0.734189
GSE_Complex	4	-0.027131	0.0596952	0.714	0.881403	0.137428	0.0895473	0.147	0.431812
GST-Smad3	9	0.286152	0.0313853	0.302	0.771674	0.177969	0.044659	0.087	0.286947
Gyl1p/Gyp5p_complex	7	0.0919881	0.0427906	0.289	0.771674	-0.0108682	0.0623309	0.931	0.967006
H+-transporting_ATPase,_vacuolar	15	0.0508581	0.0281975	0.144	0.752	-0.171755	0.0300223	0.37	0.734189
H2AX_complex,_isolated_from_cells_without_IR_exposure	7	0.0146105	0.0389458	0.775	0.891854	0.174898	0.0650665	0.053	0.207583
H3.3_com	10	-0.068283	0.0340474	0.114	0.715613	0.0119093	0.0393254	0.871	0.952603
HCF-1N	13	0.00209365	0.0263597	0.955	0.987516	0.199534	0.037916	0.001	0.00989474
HDAC1-PP1	5	0.00937134	0.0496207	0.897	0.952746	0.309158	0.0945827	0.004	0.0313333
HDAC3/NCOR_complex	5	-0.0782404	0.0783639	0.486	0.832155	0.276863	0.0590487	0.007	0.0438667
HES1_promoter-Notch_enhancer_complex	8	0.0723746	0.0436527	0.321	0.771674	-0.0898178	0.0590903	0.524	0.800911
heterotrimeric_G-protein_complex	10	0.0740914	0.0375586	0.141	0.752	-0.0846689	0.0312844	0.341	0.720315
HMC_Complex	8	0.0279251	0.0309049	0.648	0.860563	0.0185321	0.0589771	0.907	0.952603
HMGB1-HMGB2-HSC70-ERP60-GAPDH_complex	4	0.0298806	0.13623	0.722	0.881403	-0.144372	0.0614863	0.187	0.502229
HOPS_complex	7	0.0348421	0.0467062	0.488	0.832155	-0.0122078	0.0321618	0.964	0.979632
Hse1p/Vps27p_complex	5	-0.0417186	0.0541057	0.6	0.835556	-0.0133124	0.110147	0.888	0.952603
Hym1p/Kic1p/Sog2p_complex	6	-0.0249371	0.0493556	0.734	0.884564	-0.159323	0.05647	0.505	0.793607
INO80.com	6	0.076332	0.0522218	0.366	0.772215	0.0357415	0.0896893	0.513	0.793607
Integrator	11	-0.065023	0.0241756	0.051	0.564	-0.110631	0.032324	0.508	0.793607
ISW1b_complex	5	-0.0257448	0.0468248	0.402	0.79295	0.0532685	0.126505	0.561	0.823969
ITGA2b-ITGB3-CD9-GP1b-CD47_complex	5	0.0751365	0.0912662	0.243	0.752	0.00134075	0.0628877	0.988	0.988
ITGA6-ITGB4-Laminin10/12_complex	4	0.150644	0.0489704	0.204	0.752	-0.141685	0.0638759	0.175	0.483824
Kel1p/Kel2p/Lte1p_complex	4	0.118413	0.130984	0.178	0.752	0.022259	0.109169	0.838	0.952603
Kinase_maturation_complex_1	12	-0.0611359	0.0249003	0.295	0.771674	0.120391	0.0341626	0.019	0.0915897
Kinase_maturation_complex_2	5	-0.0543083	0.0587819	0.305	0.771674	0.124323	0.0986685	0.103	0.325867
KMT2C/D_containing_complex	5	-0.0876027	0.0751645	0.213	0.752	0.296405	0.0443189	0.001	0.00989474
Large_Drosha_complex	15	-0.0355478	0.019747	0.256	0.752	0.194685	0.0278641	0.006	0.0433846
LAT-PLC-gamma-1-p85-GRB2-CBL-VAV-SLP-76_signaling_complex,_C305_activated	5	0.192847	0.0666888	0.073	0.653524	0.10297	0.101214	0.448	0.793607
MAP2K1-BRAF-RAF1-YWHAE-KSR1_complex	4	-0.101636	0.119927	0.19	0.752	-0.10661	0.196065	0.418	0.78584
MCM_complex	7	0.368776	0.0431201	0.006	0.376	0.15233	0.0422471	0.262	0.6157
Mediator	8	-0.00504859	0.0407138	0.83	0.923314	-0.0318045	0.0485899	0.674	0.911597
Mitochondrial_complex_I	7	0.252802	0.0369719	0.06	0.593684	-0.0504142	0.033592	0.284	0.643277
Mitochondrial_complex_II	4	0.179562	0.0470112	0.116	0.715613	-0.0442552	0.112357	0.709	0.919255
Mitochondrial_complex_III	8	0.22118	0.0284565	0.116	0.715613	-0.0843112	0.0461626	0.382	0.740371
Mitochondrial_complex_IV	5	0.223247	0.0411498	0.082	0.670261	0.00218206	0.0718416	0.984	0.988
Mitochondrial_complex_V	10	0.311315	0.0227429	0.014	0.404923	-0.0780172	0.0279809	0.495	0.793607
Mitochondrial_inner_membrane_translocase	4	0.140356	0.0781125	0.19	0.752	0.0954032	0.0660037	0.254	0.604456
Mitochondrial_outer_membrane_translocase	4	-0.185193	0.101985	0.069	0.6486	-0.221514	0.101831	0.022	0.096186
mitochondrial_oxoglutarate_dehydrogenase_complex	5	0.254998	0.0490107	0.001	0.094	0.242623	0.0803232	0.003	0.0256364
mitochondrial_pyruvate_dehydrogenase_complex	9	0.102887	0.0333805	0.251	0.752	0.306966	0.0467094	0.001	0.00989474
mitochondrial_ribosomal_large_subunit	31	0.139877	0.00733316	0.172	0.752	-0.0427066	0.00885835	0.762	0.933896
mitochondrial_ribosomal_small_subunit	19	0.236475	0.0161438	0.011	0.404923	0.0586993	0.0323837	0.687	0.918667
MMS22L-TONSL	5	0.318101	0.0657233	0.024	0.404923	0.027567	0.0411553	0.756	0.933896
Mob1p/Dbf2p_complex	5	-0.0391989	0.0551505	0.38	0.772215	-0.0216225	0.129253	0.906	0.952603
Mob2p/Cbk1p_complex	5	0.0110119	0.0652979	0.765	0.891854	-0.0888199	0.146055	0.877	0.952603
mRNA_cleavage_factor_complex_(CFI)	13	-0.0203997	0.0220333	0.557	0.832155	0.153335	0.0241182	0.056	0.214857
multi-eIF_complex	8	0.015115	0.036822	0.809	0.916217	0.0612244	0.0525674	0.737	0.929906
multi-tRNAsynthase_complex	10	0.0235735	0.0295888	0.71	0.881403	-0.0753311	0.0375639	0.512	0.793607
N-CoR-1	7	0.0497939	0.0557517	0.556	0.832155	0.137656	0.0514097	0.076	0.2632
NatA_complex	4	0.112074	0.0873442	0.097	0.715613	0.261417	0.223439	0.165	0.47
Nonsense-mediated_mRNA_decay_pathway_complex	6	0.0549509	0.0417149	0.469	0.831811	0.305334	0.0686861	0.206	0.525892
NuA4/Tip60_HAT_complex	5	0.135632	0.0566864	0.294	0.771674	0.30613	0.0755937	0.003	0.0256364
Nuclear_cap_binding_complex_(NCBC)	6	0.000625305	0.0617884	0.986	0.991273	0.258574	0.0760873	0.104	0.325867
Nuclear_pore_complex_(NPC)	24	-0.00552363	0.0133094	0.764	0.891854	-0.0772654	0.0162461	0.289	0.64681
nuclear_ubiquitin_ligase_complex	7	-0.245567	0.0511221	0.001	0.094	0.0331163	0.0787536	0.698	0.919255
NuRD_complex	10	-0.0862484	0.0277921	0.039	0.45825	0.403842	0.0413043	0.001	0.00989474
oligosaccharyl_transferase_complex	7	-0.0887549	0.0302635	0.256	0.752	-0.190539	0.0688274	0.004	0.0313333
p27-cyclinE-Cdk2_-_Ubiquitin_E3_ligase_(SKP1A,_SKP2,_CUL1,_CKS1B,_RBX1)_complex	5	0.00677357	0.107009	0.956	0.987516	0.0460381	0.0981799	0.501	0.793607
P2X7_receptor_signalling_complex	6	-0.0502734	0.0567962	0.299	0.771674	0.059062	0.0927937	0.458	0.793607
p97/VCP-VIMP-DERL1-DERL2-HRD1-SEL1L_complex	6	-0.117647	0.039351	0.215	0.752	0.160929	0.055404	0.015	0.0805714
Paf_complex	5	-0.156525	0.0697376	0.02	0.404923	0.197553	0.0890824	0.02	0.0917073
PAM_complex	4	-0.00251775	0.0532253	0.973	0.991273	-0.063794	0.115296	0.62	0.869851
PFD-like	7	-0.0343133	0.0448228	0.643	0.860563	0.135884	0.0638939	0.066	0.24816
Pho85p/Pcl1p_complex	5	0.0833542	0.0757127	0.011	0.404923	-0.157368	0.108474	0.566	0.824868
Polycystin-1_multiprotein_complex_(ACTN1,_CDH1,_SRC,_JUP,_VCL,_CTNNB1,_PXN,_BCAR1,_PKD1,_PTK2,_TLN1)	10	0.077814	0.0265952	0.155	0.752	0.0394086	0.0395596	0.48	0.793607
prefoldin_complex	4	0.165343	0.135682	0.352	0.771674	0.153489	0.110342	0.207	0.525892
Profilin_1_complex	4	-0.0195062	0.0850803	0.82	0.923114	0.0145267	0.123531	0.872	0.952603
protein_phosphatase_type_2A_complex_(Rts1p)	8	-0.0212691	0.0323436	0.551	0.832155	0.020779	0.0709805	0.759	0.933896
Prp19-associated_complex	6	0.0644619	0.0424327	0.327	0.771674	0.145113	0.0430735	0.427	0.793607
RAF1-PPP2-PIN1_complex	5	0.0335512	0.0679266	0.743	0.889707	0.083328	0.119952	0.49	0.793607
RalBP1-CCNB1-AP2A-NUMB-EPN1_complex	5	0.0987848	0.063596	0.215	0.752	-0.35267	0.0905758	0.08	0.268571
RANBP9-containing_complex	9	-0.0162233	0.0314553	0.667	0.876895	0.113335	0.0430519	0.267	0.619704
Rap1_complex	6	-0.022849	0.0652747	0.685	0.878612	0.0176944	0.0609159	0.823	0.952603
RC_complex_during_S-phase_of_cell_cycle	8	0.0423788	0.0407142	0.466	0.831811	0.0366551	0.0517108	0.651	0.893343
retromer_complex	7	-0.085459	0.0277088	0.212	0.752	0.0114496	0.10276	0.848	0.952603
RICH1/AMOT_polarity_complex,_Flag-Rich1_precipitated	8	0.0525496	0.0527614	0.167	0.752	0.00812861	0.0669717	0.95	0.979038
RNA_Degradation_Complex	4	0.172488	0.106647	0.193	0.752	0.0666565	0.143034	0.458	0.793607
RNA_pol_II_containing_coactivator_complex_Tat-SF	5	0.0162627	0.0772501	0.778	0.891854	0.239388	0.173672	0.362	0.734189
RNA_polymerase_II_complex,__chromatin_structure_modifying	13	-0.0166646	0.0292674	0.722	0.881403	0.0193581	0.0462573	0.875	0.952603
RNA_polymerase_II_core_complex	7	0.0181503	0.0484004	0.687	0.878612	0.0262682	0.0640545	0.72	0.920816
RNA_polymerase_III_core_complex	6	-0.0542194	0.053758	0.348	0.771674	0.114248	0.0710892	0.077	0.2632
Rot2p/Gtb1p_complex	4	-0.0935501	0.0564749	0.331	0.771674	-0.0965624	0.0691415	0.551	0.823969
Rpd3L_complex	6	-0.106539	0.0473801	0.118	0.715613	0.24932	0.0978715	0.013	0.0718824
RSC	16	0.00153504	0.0205169	0.947	0.987516	0.0262987	0.0251465	0.643	0.888853
Sac3-Thp	4	0.00448575	0.0791239	0.97	0.991273	-0.0848336	0.114741	0.504	0.793607
SCF-CDC4_complex	6	-0.199983	0.0401155	0.024	0.404923	0.111515	0.0984752	0.045	0.188
Septin_complex	5	0.216688	0.0756387	0.163	0.752	0.165592	0.0557447	0.02	0.0917073
Signal_recognition_particle_(SRP)_complex	5	-0.0476629	0.0898904	0.553	0.832155	0.108278	0.0924929	0.582	0.841662
Sin3-CI	10	-0.0211816	0.0326722	0.64	0.860563	0.26438	0.0491921	0.001	0.00989474
SMG-1-Upf1-eRF1-eRF3_complex_(SURF)	5	0.0400873	0.0597746	0.543	0.832155	0.0421531	0.100076	0.788	0.947185
SMN-PolII-RHA_complex	6	-0.0821254	0.0806194	0.086	0.673667	0.241624	0.0844417	0.002	0.0188
SNARE_complex	6	-0.12909	0.0511789	0.018	0.404923	0.179243	0.0606367	0.109	0.335934
Snf1p/Snf4p/Sip2p_complex	5	-0.0279477	0.066449	0.528	0.832155	0.245901	0.0727701	0.272	0.62361
SPB_components	4	-0.0756834	0.0841444	0.25	0.752	0.128018	0.105099	0.233	0.576368
Spliceosome-A	17	-0.0231353	0.0132172	0.551	0.832155	0.188421	0.0239882	0.007	0.0438667
Spliceosome-B	10	0.0286596	0.0408636	0.541	0.832155	0.0534282	0.0300311	0.393	0.753918
Spliceosome-Bact	8	0.00621709	0.0437957	0.849	0.927977	0.155726	0.0387633	0.001	0.00989474
Spliceosome-C	9	-0.0640964	0.0335634	0.153	0.752	0.147481	0.0658366	0.298	0.659106
Spliceosome-LSm	4	0.203149	0.0521668	0.231	0.752	0.0555083	0.0705651	0.791	0.947185
Spliceosome-Prp19	7	0.05512	0.0406764	0.649	0.860563	0.243193	0.0419734	0.001	0.00989474
Spliceosome-Sm	5	0.143081	0.0710602	0.503	0.832155	0.255058	0.0455967	0.018	0.0890526
Spliceosome-U2	9	0.0130934	0.0383783	0.677	0.877766	0.242449	0.0247063	0.001	0.00989474
Spliceosome-U4/U6	4	0.0292016	0.0798369	0.731	0.884564	-0.023976	0.101079	0.882	0.952603
Spliceosome-U5	8	-0.0607632	0.0468249	0.422	0.79295	0.117827	0.046968	0.327	0.714837
SRC-3_complex	4	0.149436	0.0838395	0.348	0.771674	0.2379	0.148088	0.247	0.595333
SRCAP	4	0.162525	0.0603487	0.234	0.752	0.297006	0.112541	0.016	0.0835556
SRm160/300_complex	5	-0.0265736	0.0796343	0.846	0.927977	0.243761	0.090381	0.009	0.052875
Sro1p/Sec4p/Sec9p_complex	8	-0.011581	0.0306576	0.569	0.832155	0.0812162	0.0435364	0.467	0.793607
STE5-MAPK_complex	5	0.0317178	0.0507212	0.444	0.818353	0.0522022	0.156847	0.637	0.887081
Survival_of_motor_neuron_(SMN)_complex	9	0.0159806	0.0377434	0.827	0.923314	0.240724	0.0458913	0.001	0.00989474
Suv39h1	6	-0.081635	0.0696379	0.237	0.752	0.11332	0.0834422	0.338	0.720315
SWI/SNF_chromatin-remodeling_complex	5	-0.0698011	0.0934354	0.237	0.752	0.175088	0.0972981	0.242	0.590857
telomerase	8	0.0333179	0.032335	0.382	0.772215	0.277552	0.0464612	0.001	0.00989474
TFIIIC_complex	5	0.0404237	0.0771072	0.536	0.832155	0.0924956	0.11373	0.434	0.793607
TNF-alpha/NF-kappa_B_signaling_complex_(CHUK,_BTRC,_NFKB2,_PPP6C,_REL,_CUL1,_IKBKE,_SAPS2,_SAPS1,_ANKRD28,_RELA,_SKP1)	10	-0.00535675	0.0301419	0.861	0.930276	0.0589258	0.0582292	0.201	0.524833
TNF-alpha/Nf-kappa_B_signaling_complex_(RPL6,_RPL30,_RPS13,_CHUK,_DDX3X,_NFKB2,_NFKBIB,_REL,_IKBKG,_NFKB1,_MAP3K8,_RELB,_GLG1,_NFKBIA,_RELA,_TNIP2,__GTF2I)	10	0.0507602	0.0265937	0.183	0.752	0.12754	0.0466998	0.592	0.849588
TNF-alpha/NF-kappa_B_signaling_complex_6	11	0.0630225	0.0250502	0.409	0.79295	0.103631	0.0352244	0.515	0.793607
TNF-alpha/NF-kappa_B_signaling_complex_7	5	-0.0879456	0.0691534	0.226	0.752	0.257288	0.111255	0.001	0.00989474
Toposome	5	-0.0868201	0.0873023	0.293	0.771674	0.312824	0.12909	0.001	0.00989474
TORC_2_complex	4	0.0571002	0.11886	0.325	0.771674	0.0601279	0.0453892	0.554	0.823969
Transcription-export_(TREX)_complex	8	0.00661095	0.0452977	0.912	0.963236	0.181784	0.0561258	0.005	0.0376
TRAPP_complex	7	-0.0537672	0.0657206	0.421	0.79295	0.239134	0.0688896	0.049	0.200261
Tubulins	9	-0.0276757	0.0478789	0.565	0.832155	0.145894	0.0348824	0.007	0.0438667
Ubiquilin-proteasome_complex	6	-0.092431	0.066207	0.371	0.772215	0.098028	0.0800817	0.161	0.465662
Ubiquitin_ligase_complex_(TRAF6,_TAB2,_MALT1,_UEV1A,_BCL10)	4	-0.0686688	0.0983973	0.324	0.771674	0.0364132	0.211162	0.765	0.933896
UTM-SGCE-DAG1-CAV1-NOS3_complex	4	-0.22103	0.0599321	0.027	0.404923	0.177177	0.0985806	0.074	0.2632
Wave-2_complex	4	0.0627362	0.172836	0.562	0.832155	-0.0746693	0.0965514	0.751	0.933896
Yph1-L	13	0.10841	0.0248815	0.033	0.4136	0.0624028	0.0217882	0.534	0.809613
