# Supplementary material for: Genome-wide transcript and protein analysis highlights the role of protein homeostasis in the aging mouse heart
Source: HighWire-hosted journal article supplement (doi:10.1101/gr.275672.121), 2022-03-11

Directories based on  
Heart\_Data\_December2021 folder

Transcripts

Proteins

Genotypes

**Neogen Files**  
Location: <https://dodb.jax.org/>

**FASTQ Files**  
Location: <https://www.ncbi.nlm.nih.gov/bioproject/PRJNA510989/>

**Pride Files**  
Location: <http://proteomecentral.proteomexchange.org/cgi/GetDataset?ID=PXD023724>

**Array GenoProbs**  
Location: /Genotype/Data/  
CS\_AlleleProbs.rds

**GBRS Genoprobs**  
Location: /Genotype/Data/  
GBRS\_genoprobs\_gathered.RData

**Est. Read Counts**  
Location: /RNA/Results/rna\_counts.RDS

**Peptide Quant.**  
Location: /Protein/Data/heart\_samples\_peptides.tsv

**Geno QC**  
Script:  
/Genotype/QC\_array\_vs\_GBRS/  
Scripts/comparing\_genoprobs.R

**Transform**  
Script:  
/QTLviewer\_dataset/Scripts/  
QTLv\_dataset\_setup.R

**RollUp**  
Script:  
/Protein/Scripts/run\_protein\_rollup\_alt.R

**QC'd Genotypes**  
Location:  
/Genotype/QC\_array\_vs\_GBRS/  
Results/genoprobs.RDS

Annotations

**Mouse Data**  
Location:  
/Protein/Results/debatch\_nopoly\_protein\_heart.csv

**Combine**  
Script:  
/QTLviewer\_dataset/Scripts/  
QTLv\_dataset\_setup.R

**QTLViewer File**  
Location:  
/QTLviewer\_dataset/  
JAC\_DO\_Heart\_v9.zip

**GBRS**  
Script:  
/GBRS\_scripts

**Gygi Lab**

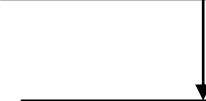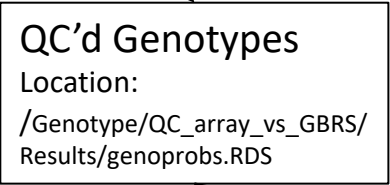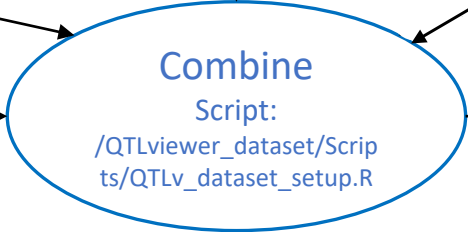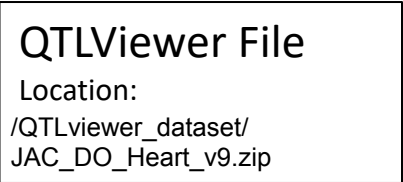

Supplement: Supplemental_Scripts.zip [file HeartWorkflow.pdf › Scripts/HeartWorkflow.pdf]
